# Supplementary material for: Mechanistic study of celastrol-mediated inhibition of proinflammatory activation of macrophages in IgA nephropathy via down-regulating ECM1
Source: PubMed Central journal article supplement (PMC11528456; doi:10.7150/ijbs.99738), 2024-10-21
Supplement: ijbsv20p5731s1.pdf [file ijbsv20p5731s1.pdf]

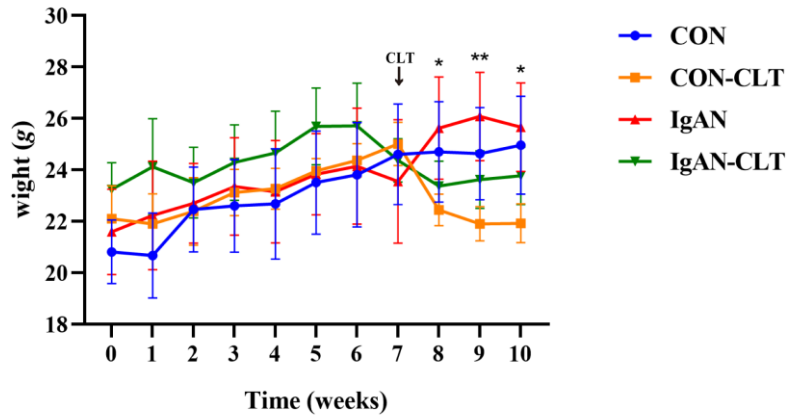

1  
2 **Figure S1 Line chart of mice body weight change.** Statistical differences in  
3 multiple groups were determined by one-way ANOVA followed by Tukey's multiple  
4 comparisons. All data is represented as mean  $\pm$  SD, n=4.

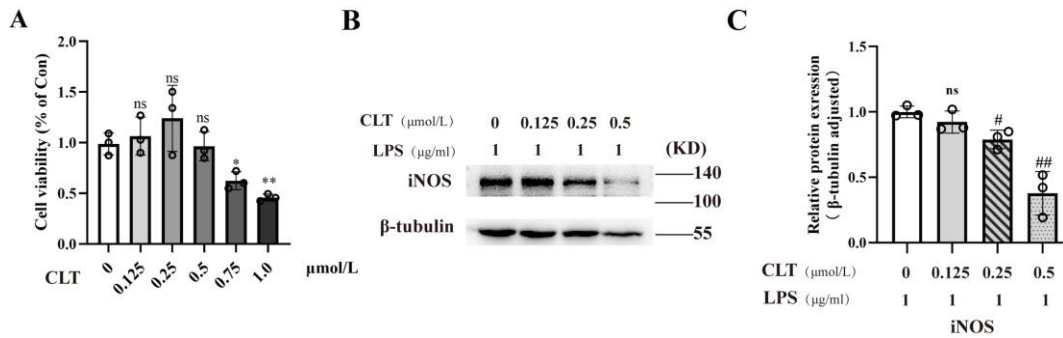

7  
8 **Figure S2 The optimal concentration of CLT in Raw 264.7 cells.** (A)  
9 Detected cell viability to screen appropriate intervention concentrations by the  
10 CCK8 method. (B) Immunoblot analyses and (C) quantitative determination of iNOS  
11 in the LPS-induced Raw 264.7, set the CLT concentration gradient to 0, 0.125, 0.25,  
12 and 0.5  $\mu$ mol/L. Statistical differences between treatment groups and CON group  
13 were analyzed by student's t-test analysis. All data is represented as mean  $\pm$  SD,  
14 n=3.\*\*\*: p < 0.001, vs. CON. #: p < 0.05, ##: p < 0.01, vs. LPS. ns: p > 0.05.

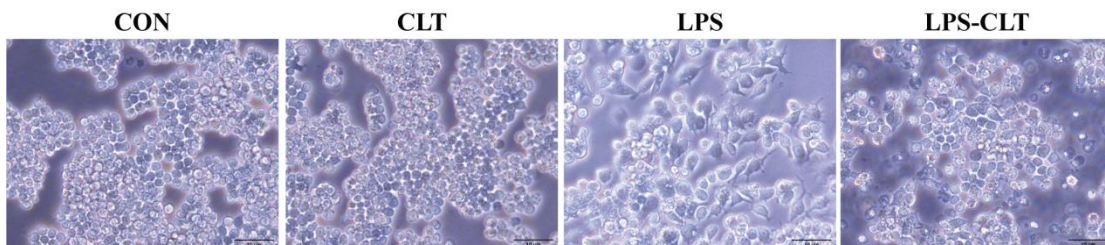

17  
18 **Figure S3 Morphological changes in Raw 264.7 cells.** Treatment of  
19 LPS-induced Raw 264.7 cells without or with CLT for 24 h. Representative light  
20 microscopy images are presented. Images were captured at  $\times$ 200 magnification.

21

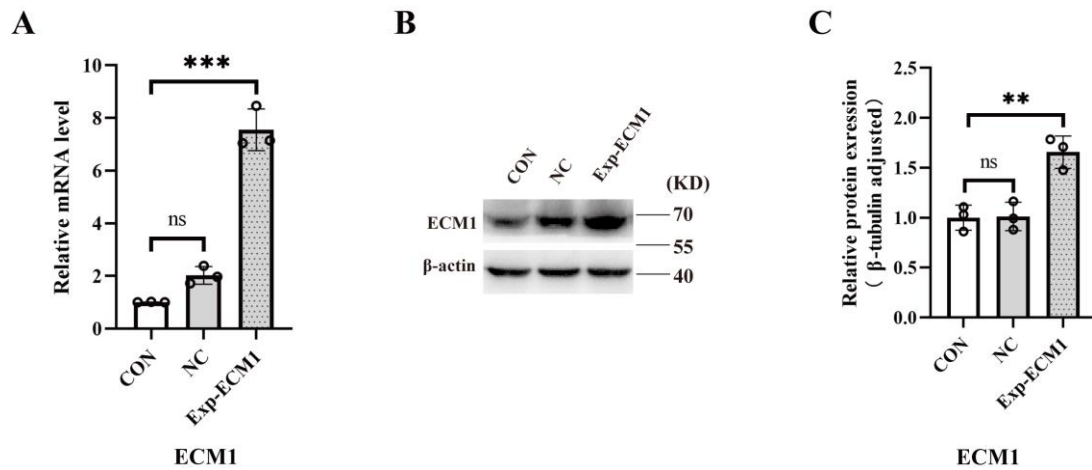

23

24 **Figure S4 Constructing an ECM1 overexpression Raw 264.7 cell line.** (A)  
 25 The mRNA expression of ECM1 in each group of cells; (B) The protein expression  
 26 level of ECM1 in each group of cells; (C) Quantitative determination of ECM1 protein  
 27 expression; Statistical differences in multiple groups were determined by one-way  
 28 ANOVA followed by Tukey's multiple comparisons. All data is represented as mean ±  
 29 SD, n=3. \*\*: p<0.01, \*\*\*: p < 0.001, vs. CON. ns: p > 0.05.

30

31

32 **Table S1 Primers List**

| Gene    | primer sequences          |
|---------|---------------------------|
| F-iNOS  | ATCTTGGAGCGAGTTGTGGATTGTC |
| R-iNOS  | TAGGTGAGGGCTTGGCTGAGTG    |
| F-Arg1  | AGACAGCAGAGGAGGTGAAGAGTAC |
| R-Arg1  | AAGGTAGTCAGTCCCTGGCTTATGG |
| F-IL6   | CTTCTTGGGACTGATGCTGGTGAC  |
| R-IL6   | TCTGTTGGGAGTGGTATCCTCTGTG |
| F-TNF-α | CGCTCTTCTGTCTACTGAACTTCGG |
| R-TNF-α | GTGGTTTGTGAGTGTGAGGGTCTG  |
| F-ECM1  | GCGAGCTTCCATATCCAGAACAGG  |
| R-ECM1  | TCAGGAGACAGGTCACAGCAGAG   |

33
